# Supplementary material for: GIS-based assessment of spatial equity in primary healthcare accessibility in Kassala City, Sudan
Source: Research Square preprint supplement (doi:10.21203/rs.3.rs-8389323/v1), 2026-01-19
Supplement: Supplementary file 1 [file 48e46de10371f137b68ff749.docx]

# Supplementary File S2. Semi-structured interview guide (English)

Manuscript: “GIS-based assessment of spatial equity in primary healthcare accessibility in Kassala City, Sudan.”

Purpose: This guide was developed for the current study to explore perceived barriers to access, adequacy of services, service-area overlap, and priority locations for future primary healthcare centres.

Administration: Semi-structured interviews with health centre directors and practising physicians in Kassala City. Interviews were conducted in person by the author. Participation was voluntary and based on informed consent. Responses were recorded as field notes; no patient-identifiable information was collected.

# Section A. Background

1. Please describe your current role and years of experience in this facility/setting.
2. What services are provided at your facility (e.g., general consultation, immunization, chronic disease clinics)?
3. What are the official opening hours and staffing levels (doctors, nurses, other staff) in a typical week?

# Section B. Spatial access and barriers

1. From your experience, which neighbourhoods or communities primarily use this facility? (If possible, name key areas.)
2. What are the main spatial barriers patients face when reaching this facility (distance, transport availability/cost, road conditions, safety, seasonal flooding/rainy season)?
3. Are there specific groups more affected by access barriers (e.g., older adults, pregnant women, children, people with disabilities)?
4. Do you perceive that some nearby facilities overlap in the populations they serve? If yes, where and why?

# Section C. Demand, overcrowding, and service organisation

1. How would you describe patient demand and workload at this facility (low/moderate/high)? What times or seasons are busiest?
2. Are there capacity constraints (staff, medicines, equipment, space) that affect quality of care or waiting time?
3. Do patients sometimes bypass primary care and go directly to Kassala Teaching Hospital? If so, why?

# Section D. Temporal access and emergencies

1. To what extent do current opening hours meet community needs? What problems occur after hours?
2. How are emergencies handled, and what is the referral pathway to hospitals?
3. What challenges exist for ambulance dispatch and inter-facility communication (availability, response time, coordination)?

# Section E. Planning priorities and recommendations

1. Which neighbourhoods or areas are most underserved and should be prioritised for new or backup centres? Please explain.
2. If additional facilities were to be established, what siting criteria do you consider most important (population density, road access, proximity to vulnerable groups, future growth)?
3. Do you support extending hours (e.g., two shifts or 24-hour units) in selected centres? Which centres and why?
4. How could GIS-based planning be integrated into routine decision-making at the local/state level?

# Closing

1. Is there anything else you would like to add regarding healthcare accessibility, equity, and service planning in Kassala City?
