# Supplementary material for: GIS-based assessment of spatial equity in primary healthcare accessibility in Kassala City, Sudan
Source: Research Square preprint supplement (doi:10.21203/rs.3.rs-8389323/v1), 2026-01-19
Supplement: Supplementary file 2 [file f4a0f63ba961b773fc895a6a.xlsx]

## Sheet: Table1_EastBank
Surplus of the total population of the specified neighborhoods.	Total population.	Neighborhoods are benefiting from the center.	Health center.	No
+ 5869	15869	alianiqadh shamal - alhulanaqat shamal - dar alsalam 16	alianiqadh shamal	1
4379	5621	Borno and Bargo	Borno and Bargo	2
2956	7044	makram aldorwa- makram alqadima	Dorwa	3
+ 2950	12950	alsuwriba - hayu alshahid a +b+kila +janub + alshahid taj alsiri	Suwriba	4
+19955	29955	shaabiya murabae (1/22/23)	Shaabiya	5
3907	6093	Mirghania+ hayu aljisr bitiyi	Mirghania	6
+280	10280	Biriyi+ qandahar +alwahda	Biriyi	7
0	0	Hamed Wakil	Hamed Wakil	8
7524	2476	Kadogli	Kadogli	9
5737	4263	makram murabae 2 +mukram almudrasi+jamie sulayman alfarisii	Mukram West	10
+ 1746	11764	waw nur +alnaqadh sharq murabae (38/2/3/39)	Waw nur	11
2245	7755	altadamun murabae 5/8	Fatima Al-Duaij	12
+ 90	10090	Al-Tar'a+ aleamiria	Al-Tar'a	13
+ 13023	23023	alhadaya alkhatimiat alqadimat murabae (1/2/7/8/40/48)	Al-Hadaia	14
+ 16970	26970	murabaeat (30/31//25almurabaeatu)alkhatmiah aljadidahi- almurabaeat(17/18/16)-alshahid haran haa althawruh	Al-Murabaat Health Center	15
6517	3483	Al-Thawra	Al-Thawra	16
3352	6648	Al-Halanga Janub	Al-Halanga Janub	17
	184284

## Sheet: Table2_WestBank
Surplus of the total population of the specified neighborhoods.	Total population.	Neighborhoods are benefiting from the center.	Health center.	No
-2201	7799	banat janub murabaei(25/26/27/28)-murabae 4 alsuwq alshuebaa	Al-Raman	1
1695	8305	murabae (11/12/13)riba	Al-Shaheed	2
+ 7498	17498	alkarmathu-alsuwaqaa alshamaliih gha-alsuwaqaa alsamalih sha-tkruf qidbir	Al-Karmatah	3
+ 3440	13440	alsawaqaa aljanubihi-haa alrimlaha-haa alsabil sha/gh-haa alkamayin	Al-Nahda	4
+ 6796	16796	alshuhada'('a) murabae (19/20/30/36) -alshuhada' (b) murabaei(17/11/30)	Bant Janub	5
+ 481	10481	tarawah murabae (37/38/39)-bant janub murabae (47/48/40/41/42)	Tarawa	6
+ 6764	16764	gharb alqash murabae (1)-gharb alqash murabaei(2) -murabae 3('a)-mirbae 3(b)	Gharb Al-Qash	7
+ 2276	12276	mustawruh ('a/b/ju/du) -haa alrashayidh- madinat alshahid walrawdih	Mastoura	8
0	0	Mansoura	Mansoura	9
+ 15919	25919	banat janub murabaei(15/16/21)-bant janub murabae (11/12/23)-haa albutraa murabae (6/10/35)-janub murabae (13)	Yahya Al-Hussein	10
+ 9857	19857	alsikah hadid -bant murabaeun(1/2/3) walmusanaeu- banat sharq murabae (4/5/6/7)- aleumaal murabae 8 sharq wagharbi-aleumaal murabae (1/2)waldarjih	Sikkat Hadid	11
	149135

## Sheet: Table3_LoadSummary
Bank	Active centres (population > 0)	Total population in assigned neighbourhoods	Average population per centre	Population in centres >10,000 residents (%)
Eastern bank	16	184,284	≈ 11,518	≈ 76.5%
Western bank	10	149,135	≈ 14,914	≈ 89.2%

## Sheet: README
Supplementary Dataset S1: Aggregated tabular data extracted from the manuscript.
Sheets:
Table1_EastBank	Estimated population by health center catchment (east bank) as reported in Table 1 of the manuscript.
Table2_WestBank	Estimated population by health center catchment (west bank) as reported in Table 2 of the manuscript.
Table3_LoadSummary	Bank-level summary of population load per primary healthcare centre (Table 3 of the manuscript).
Notes:
- Values are as presented in the manuscript and may include approximate symbols (e.g., ≈) and signs (+/-) indicating surplus/deficit relative to a planning benchmark.
- This file does not include third-party road-network GIS layers or microdata that are subject to restrictions.
